# Supplementary material for: Prostate Cancer Awareness Among Women: A Mixed-methods Systematic Review
Source: Research Square preprint supplement (doi:10.21203/rs.3.rs-121896/v1), 2020-12-08
Supplement: Supplementary file 1 [file 3b878f45211852f22f08091a.docx]

**APPENDIX 2**

**ELIGIBILITY CRITERIA**

**INCLUSION CRITERIA**

- Studies conducted in women aged 18 years and above.
- Studies conducted in women of all racial backgrounds.
- Studies published from January 1999 to December 2019.
- Studies conducted in women of all geographical locations.
- Studies of all research designs.
- All studies on the knowledge of women on the signs and symptoms of prostate cancer.
- All studies on the knowledge of women on the causes and risk factors of prostate cancer.
- All studies on the knowledge of women on the screening recommendations of prostate cancer.
- Studies that were published in the English language.
- Studies with abstract and full text available.

**EXCLUSION CRITERIA**

- Studies that were published before January 1999 or after December 2019.
- Studies that were not published in the English language.
- Studies that include women below the age of 18 years.
- Studies in which the age of included women cannot be established.
- Studies that did not indicated the number/percentage of included women.
- Studies that exclusively included men without any women component (18 years and above).
- Studies conducted amongst women who were previously given education on prostate cancer.
- Studies that exclusively involved lesbian, gay, bisexual, transsexual/transgender, and queer/questioning (LGBTQ) paticipants.
- Studies that exclusively included healthcare professionals.
- Studies that exclusively involved healthcare and college/university students.
- Studies that do not include the outcome of interest.
- Book chapters.
- Reviews and overviews.
- Abstracts and conference papers.
- Dissertations and thesis.
- Commentaries and letters to editors.
- Studies published without abstracts.
